# Supplementary material for: Response of FDG avid pelvic bone marrow to concurrent chemoradiation for anal cancer
Source: PubMed Central journal article supplement (PMC7077746; doi:10.1016/j.radonc.2019.08.016), 2020-02

(A) Plot of normality

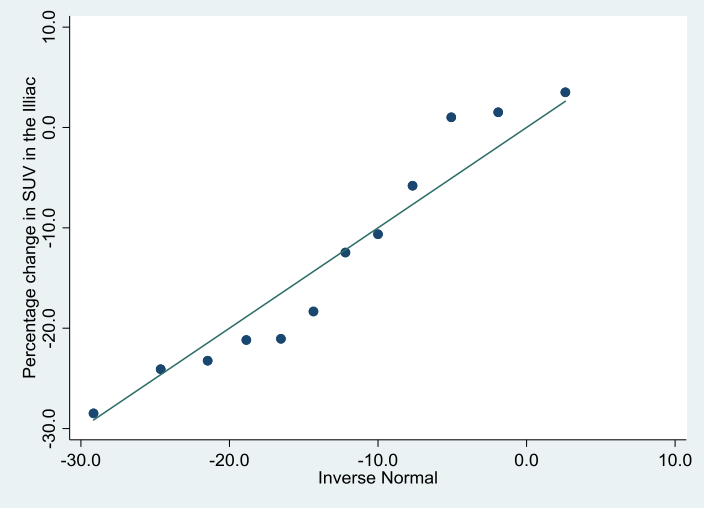

(B) Scatterplot of outcome vs predictor

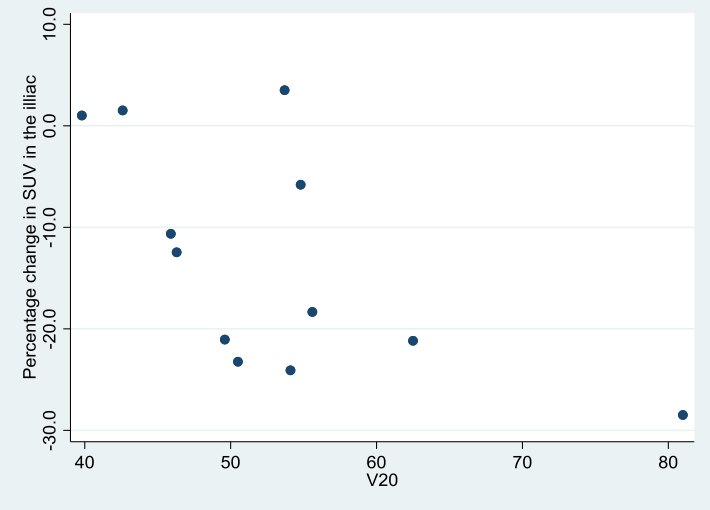

(C) Scatterplot of residuals vs fitted values

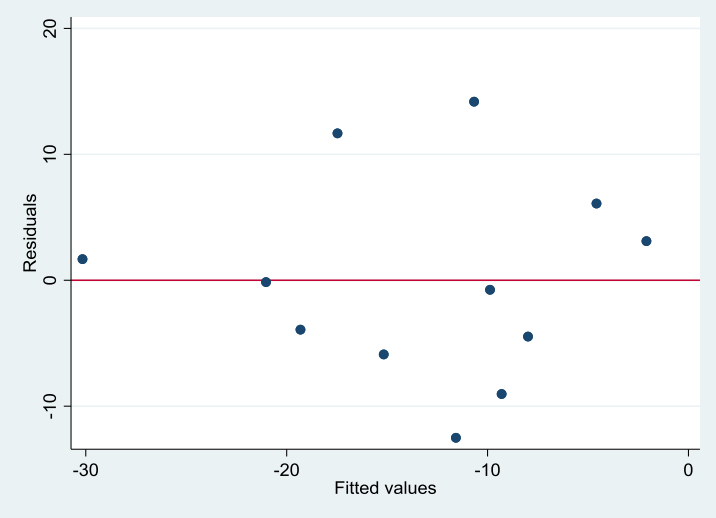

Supplement: mmc3.pdf [file mmc3.pdf]
