# Supplementary material for: Response of FDG avid pelvic bone marrow to concurrent chemoradiation for anal cancer
Source: PubMed Central journal article supplement (PMC7077746; doi:10.1016/j.radonc.2019.08.016), 2020-02

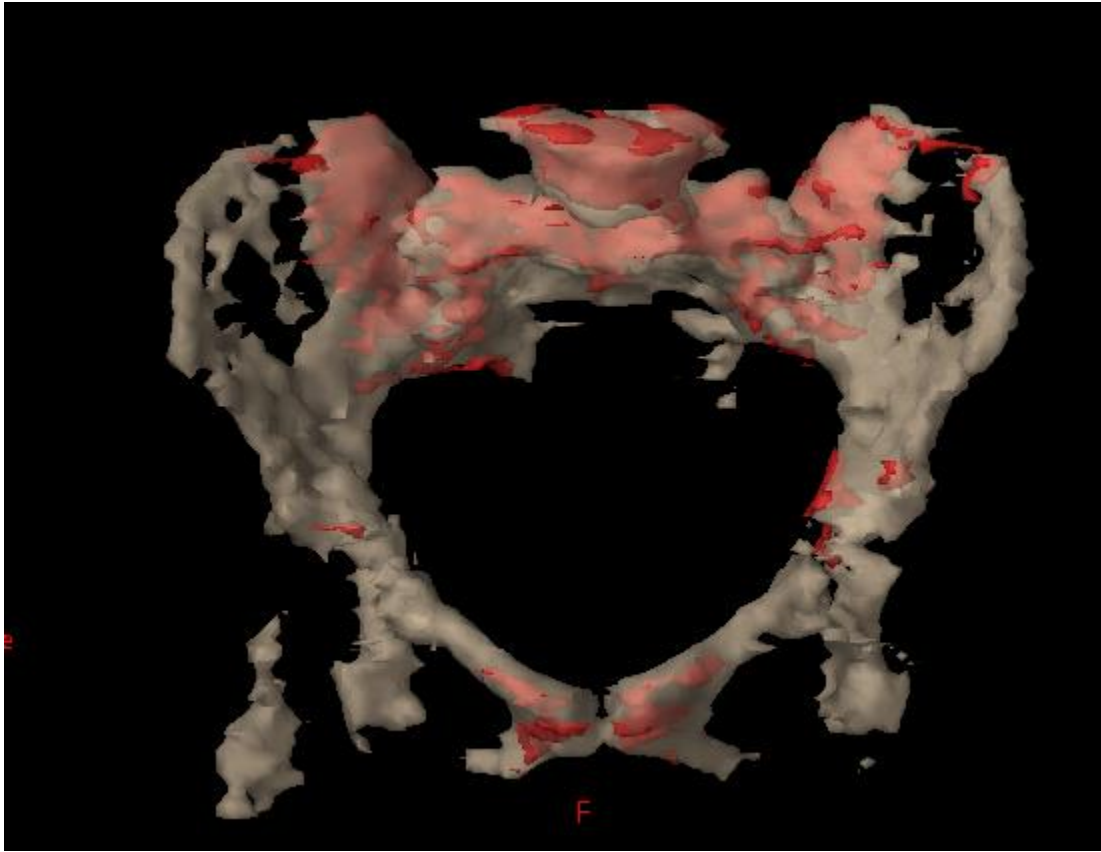

Supplement: mmc4.pdf [file mmc4.pdf]
